# Supplementary material for: Synthesis and characterization of novel simultaneous C and O-coordinated and nitrate-bridged complexes of silver(i) with carbonyl-stabilized sulfonium ylides and their antibacterial activities
Source: Royal Society of Chemistry journal article supplement (doi:10.1039/c2dt31902k), 2012-11-12
Supplement: c2dt31902k.pdf [file c2dt31902k.pdf]

## Supporting Information

# Synthesis and Characterization of Novel Simultaneous C and O- Coordinated and Nitrate-Bridged Complexes of Silver(I) with Carbonyl-Stabilized Sulfonium Ylides and Their Antibacterial Activities

Seyyed Javad Sabounchei<sup>\*a</sup>, Fateme Akhlaghi Bagherjeri<sup>a</sup>, Zeynab Mozafari<sup>a</sup>, Colette Boskovic<sup>b</sup>, Robert W. Gable<sup>b</sup>, Roya Karamian<sup>c</sup>, Mostafa Asadbegy<sup>c</sup>

<sup>a</sup>Faculty of Chemistry, Bu-Ali Sina University, Hamedan, 65174, Iran Tel: +988118272072; fax: +988118273231. E-mail address: jsabounchei@yahoo.co.uk (S.J. Sabounchei)

<sup>b</sup>School of Chemistry, University of Melbourne, Victoria, 3010, Australia

<sup>c</sup>Department of Biology, Faculty of Science, Bu-Ali Sina University, Hamedan, 65174, Iran

### 2.5.1. Synthesis of ylides $(\text{Me})_2\text{SCHC}(\text{O})\text{C}_6\text{H}_4\text{R}$ ( $\text{R} = \text{H}; p\text{-NO}_2; p\text{-OMe}; p\text{-Me}$ and $p\text{-Br}$ )

**$(\text{Me})_2\text{SCHC}(\text{O})\text{C}_6\text{H}_5$ :** To an acetone solution (10 ml) of dimethylsulfide (0.062 g, 1.00 mmol) was added 2-bromoacetophenone (0.199 g, 1.00 mmol) and the mixture was stirred for 12 h. The solid product (sulfonium salt) was isolated by filtration, washed with ether and dried under reduced pressure. Further treatment with aqueous 10% NaOH solution led to elimination of HBr, giving the free ligand.<sup>28</sup> IR (KBr disk):  $\nu$  ( $\text{cm}^{-1}$ ) 1580 (C=O) and 865 (S–C).  $^1\text{H}$  NMR ( $\text{CDCl}_3$ ):  $\delta$  (ppm) 2.85 (s, 6H,  $\text{S}(\text{CH}_3)_2$ ); 4.23 (1H, CH); 7.41 (m, 3H, Ph); 7.80 (d,  $^3J_{\text{HH}} = 8.1$  Hz, 2H, Ph).  $^{13}\text{C}$ -NMR ( $\text{CDCl}_3$ , ppm):  $\delta$  28.75 (s,  $\text{S}(\text{CH}_3)_2$ ); 53.64 (s, CH); 126.30 (s, Ph(*p*)); 127.84 (s, Ph(*m*)); 129.42 (s, Ph(*o*)); 140.87 (s, Ph(*i*)); 182.50 (s, CO).

**$(\text{Me})_2\text{SCHC}(\text{O})\text{C}_6\text{H}_4\text{-}p\text{-NO}_2$ :** Ylide was prepared following the same synthetic method as that reported for ligand  $(\text{Me})_2\text{SCHC}(\text{O})\text{C}_6\text{H}_5$ . Thus, dimethylsulfide (0.062 g, 1.00 mmol) was reacted with 2-bromo-4'-nitroacetophenone (0.244 g, 1.00 mmol) giving the free ligand.<sup>27</sup> IR (KBr disk):  $\nu$  ( $\text{cm}^{-1}$ ) 1551 (C=O) and 875 (S–C).  $^1\text{H}$  NMR ( $\text{CDCl}_3$ ):  $\delta$  (ppm) 2.92 (s, 6H,  $\text{S}(\text{CH}_3)_2$ ); 4.21 (1H, CH); 7.78 (d,  $^3J_{\text{HH}} = 8.1$  Hz, 2H, Ph); 8.1 (d,  $^3J_{\text{HH}} = 8.5$  Hz, 2H, Ph).  $^{13}\text{C}$ -NMR ( $\text{CDCl}_3$ , ppm):  $\delta$  28.26 (s,  $\text{S}(\text{CH}_3)_2$ ); 54.26 (s, CH); 123.09 (s, Ph(*m*)); 127.23 (s, Ph(*o*)); 128.4 (s, Ph(*i*)); 146.84 (s, Ph(*p*)); 180.09 (s, CO).

**$(\text{Me})_2\text{SCHC}(\text{O})\text{C}_6\text{H}_4\text{-}p\text{-OCH}_3$ :** Ylide was prepared following the same synthetic method as that reported for ligand  $(\text{Me})_2\text{SCHC}(\text{O})\text{C}_6\text{H}_5$ . Thus, dimethylsulfide (0.062 g, 1.00 mmol) was reacted with 2-bromo-4'-methoxyacetophenone (0.211 g, 1.00 mmol) giving the free ligand.<sup>28</sup> IR (KBr disk):  $\nu$  ( $\text{cm}^{-1}$ ) 1583 (C=O) and 857 (S–C).  $^1\text{H}$  NMR ( $\text{CDCl}_3$ ):  $\delta$  (ppm) 2.96 (s, 6H,  $\text{S}(\text{CH}_3)_2$ ); 3.79 (s, 3H,  $\text{OCH}_3$ ); 4.27 (1H, CH); 6.83 (d,  $^3J_{\text{HH}} = 8.0$  Hz, 2H, Ph); 7.74 (d,  $^3J_{\text{HH}} = 8.0$  Hz, 2H, Ph).  $^{13}\text{C}$ -NMR ( $\text{CDCl}_3$ , ppm):  $\delta$  28.71 (s,  $\text{S}(\text{CH}_3)_2$ ); 50.54 (s,  $\text{OCH}_3$ ); 55.23 (s, CH); 113.10 (s, Ph(*p*)); 127.95 (s, Ph(*m*)); 133.45 (s, Ph(*o*)); 160.90 (s, Ph(*i*)); 182.77 (s, CO).

**(Me)<sub>2</sub>SCHC(O)C<sub>6</sub>H<sub>4</sub>-*p*-Me:** Ylide was prepared following the same synthetic method as that reported for ligand **(Me)<sub>2</sub>SCHC(O)C<sub>6</sub>H<sub>5</sub>**. Thus, dimethylsulfide (0.062 g, 1.00 mmol) was reacted with 2-bromo-4'-methylacetophenone (0.213 g, 1.00 mmol) giving the free ligand.<sup>26</sup> IR (KBr disk):  $\nu$  (cm<sup>-1</sup>) 1564 (C=O) and 879 (S-C). <sup>1</sup>H NMR (CDCl<sub>3</sub>):  $\delta$  (ppm) 2.32 (s, 3H, CH<sub>3</sub>); 2.93 (s, 6H, S(CH<sub>3</sub>)<sub>2</sub>); 4.28 (1H, CH); 7.10 (d, <sup>3</sup>J<sub>HH</sub> = 8.1 Hz, 2H, arom.); 7.65 (d, <sup>3</sup>J<sub>HH</sub> = 8.1 Hz, 2H, arom.). <sup>13</sup>C-NMR (CDCl<sub>3</sub>, ppm):  $\delta$  20.80 (s, CH<sub>3</sub>); 28.33 (s, S(CH<sub>3</sub>)<sub>2</sub>); 50.33 (s, CH); 125.98 (s, Ph(*p*)); 128.13 (s, Ph(*m*)); 138.08 (s, Ph(*o*)); 138.96 (s, Ph(*i*)); 182.32 (s, CO).

**(Me)<sub>2</sub>SCHC(O)C<sub>6</sub>H<sub>4</sub>-*p*-Br:** Ylide was prepared following the same synthetic method as that reported for ligand **(Me)<sub>2</sub>SCHC(O)C<sub>6</sub>H<sub>5</sub>**. Thus, dimethylsulfide (0.062 g, 1.00 mmol) was reacted with 2-bromo-4'-bromoacetophenone (0.260 g, 1.00 mmol) giving the free ligand.<sup>27</sup> IR (KBr disk):  $\nu$  (cm<sup>-1</sup>) 1578 (C=O) and 855 (S-C). <sup>1</sup>H NMR (CDCl<sub>3</sub>):  $\delta$  (ppm) 2.91 (s, 6H, S(CH<sub>3</sub>)<sub>2</sub>); 4.24 (1H, CH); 7.42 (d, <sup>3</sup>J<sub>HH</sub> = 8.1 Hz, 2H, Ph); 7.60 (d, <sup>3</sup>J<sub>HH</sub> = 8.1 Hz, 2H, Ph). <sup>13</sup>C-NMR (CDCl<sub>3</sub>, ppm):  $\delta$  28.15 (s, S(CH<sub>3</sub>)<sub>2</sub>); 52.27 (s, CH); 123.00 (s, Ph(*m*)); 127.64 (s, Ph(*p*)); 130.39 (s, Ph(*i*)); 139.66 (s, Ph(*o*)); 180.49 (s, CO).

**[AgNO<sub>3</sub>(Me<sub>2</sub>SCHC(O)C<sub>6</sub>H<sub>5</sub>)<sub>n</sub> (1)**

**Table S1.** Fractional Atomic Coordinates ( $\times 10^4$ ) and Equivalent Isotropic Displacement Parameters ( $\text{\AA}^2 \times 10^3$ ) for fa-assg.  $U_{\text{eq}}$  is defined as 1/3 of the trace of the orthogonalised  $U_{\text{ij}}$  tensor.

| Atom | x         | y         | z          | U(eq)     |
|------|-----------|-----------|------------|-----------|
| Ag1  | 5089.7(2) | 6340.1(2) | 5568.78(7) | 26.82(9)  |
| S1   | 1465.3(8) | 6774.3(7) | 5870.3(2)  | 22.83(14) |
| O1   | 3195(3)   | 8263(2)   | 6514.8(7)  | 28.7(4)   |
| C1   | 3280(3)   | 6136(3)   | 6080.9(8)  | 19.4(5)   |
| C2   | 3771(3)   | 7050(3)   | 6444.2(8)  | 20.4(5)   |
| C3   | 4993(3)   | 6445(3)   | 6750.6(9)  | 20.5(5)   |
| C4   | 5897(4)   | 5230(3)   | 6646.1(10) | 28.4(6)   |
| C5   | 6947(4)   | 4648(4)   | 6946.9(11) | 37.1(7)   |
| C6   | 7110(4)   | 5279(4)   | 7355.7(11) | 35.0(7)   |
| C7   | 6237(4)   | 6502(3)   | 7459.9(10) | 30.9(6)   |
| C8   | 5179(3)   | 7087(3)   | 7160.0(9)  | 24.6(6)   |
| C9   | 21(3)     | 6409(3)   | 6290.8(11) | 29.9(7)   |
| C10  | 982(4)    | 5346(3)   | 5500.2(9)  | 29.9(6)   |
| O2   | 5910(3)   | 3868(2)   | 5236.4(7)  | 30.9(4)   |
| N1   | 7075(3)   | 3246(3)   | 5408.9(7)  | 22.6(5)   |
| O3   | 7631(3)   | 3682(3)   | 5758.2(7)  | 37.2(5)   |
| O4   | 7676(3)   | 2161(2)   | 5216.5(7)  | 33.2(5)   |

**Table S2.** Anisotropic Displacement Parameters ( $\text{\AA}^2 \times 10^3$ ) for fa-assg. The Anisotropic displacement factor exponent takes the form:  $-2\pi^2[h^2a^{*2}U_{11} + \dots + 2hka \times b \times U_{12}]$

| Atom | $U_{11}$  | $U_{22}$  | $U_{33}$  | $U_{23}$ | $U_{13}$  | $U_{12}$  |
|------|-----------|-----------|-----------|----------|-----------|-----------|
| Ag1  | 26.83(13) | 28.09(14) | 25.54(13) | -0.44(7) | 5.36(7)   | -1.95(7)  |
| S1   | 23.5(3)   | 21.1(3)   | 23.9(3)   | 1.2(2)   | -5.4(2)   | 1.3(2)    |
| O1   | 34.8(11)  | 20.6(9)   | 30.7(10)  | -4.3(8)  | -6.9(9)   | 6.6(8)    |
| C1   | 18.1(12)  | 17.5(12)  | 22.6(12)  | 2.4(9)   | -1.0(9)   | 0.0(9)    |
| C2   | 19.5(12)  | 19.3(12)  | 22.4(12)  | 1.9(9)   | 1.7(10)   | -1.9(10)  |
| C3   | 19.6(12)  | 21.8(14)  | 20.0(13)  | 1.8(10)  | -0.6(9)   | -4.2(9)   |
| C4   | 27.1(14)  | 27.2(14)  | 30.9(14)  | -1.6(11) | -4.5(11)  | 2.9(11)   |
| C5   | 34.4(16)  | 29.7(16)  | 47.3(18)  | 0.8(13)  | -14.2(14) | 6.2(13)   |
| C6   | 31.6(15)  | 33.5(16)  | 39.9(16)  | 13.4(13) | -14.2(13) | -7.5(13)  |
| C7   | 31.0(15)  | 37.8(16)  | 23.8(13)  | 4.8(12)  | -5.1(11)  | -13.8(13) |
| C8   | 22.6(13)  | 26.5(15)  | 24.6(13)  | -0.5(11) | 1.6(10)   | -5(1)     |
| C9   | 23.9(14)  | 36.2(17)  | 29.5(15)  | -0.4(12) | 0.2(10)   | 4.4(11)   |
| C10  | 31.5(15)  | 29.8(15)  | 28.5(14)  | -4.5(11) | -7.1(11)  | -3.8(12)  |
| O2   | 29.4(10)  | 34.4(11)  | 29(1)     | -0.3(8)  | -4.6(8)   | 10.1(9)   |
| N1   | 22.8(11)  | 23.4(11)  | 21.7(11)  | 2.9(9)   | 2.0(9)    | -1.1(9)   |
| O3   | 35.3(12)  | 46.9(13)  | 29.3(11)  | -10.3(9) | -7.9(9)   | 2.2(10)   |
| O4   | 35.3(11)  | 28.8(11)  | 35.6(11)  | -8.3(9)  | -7.7(9)   | 11.4(9)   |

**Table S3.** Bond Lengths for fa-assg.

| Atom | Atom            | Length/Å | Atom | Atom             | Length/Å |
|------|-----------------|----------|------|------------------|----------|
| Ag1  | C1              | 2.198(3) | C3   | C8               | 1.393(4) |
| Ag1  | O2              | 2.590(2) | C4   | C5               | 1.386(4) |
| Ag1  | O4 <sup>1</sup> | 2.303(2) | C5   | C6               | 1.385(5) |
| S1   | C1              | 1.765(3) | C6   | C7               | 1.385(5) |
| S1   | C9              | 1.805(3) | C7   | C8               | 1.390(4) |
| S1   | C10             | 1.784(3) | O2   | N1               | 1.256(3) |
| O1   | C2              | 1.239(3) | N1   | O3               | 1.234(3) |
| C1   | C2              | 1.454(4) | N1   | O4               | 1.267(3) |
| C2   | C3              | 1.502(4) | O4   | Ag1 <sup>2</sup> | 2.302(2) |
| C3   | C4              | 1.393(4) |      |                  |          |

<sup>1</sup>3/2-X,1/2+Y,+Z; <sup>2</sup>3/2-X,-1/2+Y,+Z

**Table S4.** Bond Angles for fa-assg.

| Atom Atom Atom  |     |                 | Angle/°    | Atom Atom Atom |    |                  | Angle/°    |
|-----------------|-----|-----------------|------------|----------------|----|------------------|------------|
| C1              | Ag1 | O2              | 113.00(8)  | C4             | C3 | C8               | 119.1(3)   |
| C1              | Ag1 | O4 <sup>1</sup> | 158.88(9)  | C8             | C3 | C2               | 118.7(2)   |
| O4 <sup>1</sup> | Ag1 | O2              | 83.46(7)   | C5             | C4 | C3               | 120.7(3)   |
| C1              | S1  | C9              | 105.45(13) | C6             | C5 | C4               | 120.0(3)   |
| C1              | S1  | C10             | 100.63(14) | C7             | C6 | C5               | 119.8(3)   |
| C10             | S1  | C9              | 99.12(15)  | C6             | C7 | C8               | 120.5(3)   |
| S1              | C1  | Ag1             | 108.50(12) | C7             | C8 | C3               | 120.0(3)   |
| C2              | C1  | Ag1             | 107.18(17) | N1             | O2 | Ag1              | 116.60(16) |
| C2              | C1  | S1              | 109.49(18) | O2             | N1 | O4               | 118.8(2)   |
| O1              | C2  | C1              | 123.0(2)   | O3             | N1 | O2               | 120.8(2)   |
| O1              | C2  | C3              | 119.8(2)   | O3             | N1 | O4               | 120.4(2)   |
| C1              | C2  | C3              | 117.2(2)   | N1             | O4 | Ag1 <sup>2</sup> | 111.84(16) |
| C4              | C3  | C2              | 122.2(3)   |                |    |                  |            |

<sup>1</sup>3/2-X,1/2+Y,+Z; <sup>2</sup>3/2-X,-1/2+Y,+Z

**Table S5.** Hydrogen Atom Coordinates ( $\text{\AA} \times 10^4$ ) and Isotropic Displacement Parameters ( $\text{\AA}^2 \times 10^3$ ) for fa-assg.

| <b>Atom</b> | <b>x</b> | <b>y</b> | <b>z</b> | <b>U(eq)</b> |
|-------------|----------|----------|----------|--------------|
| H1          | 3179     | 5104     | 6177     | 23           |
| H4          | 5793     | 4796     | 6366     | 34           |
| H5          | 7554     | 3817     | 6873     | 45           |
| H6          | 7819     | 4875     | 7564     | 42           |
| H7          | 6362     | 6943     | 7739     | 37           |
| H8          | 4583     | 7925     | 7234     | 29           |
| H9A         | 192      | 5433     | 6408     | 45           |
| H9B         | -1044    | 6473     | 6166     | 45           |
| H9C         | 132      | 7123     | 6526     | 45           |
| H10A        | 1807     | 5268     | 5276     | 45           |
| H10B        | -35      | 5555     | 5360     | 45           |
| H10C        | 908      | 4429     | 5661     | 45           |



[Ag(Me<sub>2</sub>SCHC(O)C<sub>6</sub>H<sub>4</sub>-*m*-NO<sub>2</sub>)<sub>2</sub>]<sub>2</sub>(NO<sub>3</sub>)<sub>2</sub> · 2H<sub>2</sub>O (2)

**Table S1.** Fractional Atomic Coordinates ( $\times 10^4$ ) and Equivalent Isotropic Displacement Parameters ( $\text{\AA}^2 \times 10^3$ ) for fa-agmGau.  $U_{\text{eq}}$  is defined as 1/3 of the trace of the orthogonalised  $U_{\text{ij}}$  tensor.

| Atom | <i>x</i>    | <i>y</i>   | <i>z</i>    | U(eq)     |
|------|-------------|------------|-------------|-----------|
| Ag1  | 4751.3(3)   | 1852.7(3)  | 2011.78(15) | 28.84(11) |
| S1   | 7380.7(12)  | 2357.1(12) | 1273.0(5)   | 29.6(2)   |
| S2   | 2005.9(12)  | 2120.6(12) | 2819.7(5)   | 27.9(2)   |
| O7   | 7465(4)     | 2899(3)    | 2391.2(15)  | 28.7(7)   |
| O8   | 7444(4)     | 734(4)     | 4995.5(17)  | 45(1)     |
| O9   | 7153(5)     | 2584(4)    | 4488.6(18)  | 45(1)     |
| O10  | 1281(4)     | 3884(4)    | 1838.5(15)  | 32.3(8)   |
| O11  | 1273(11)    | 5868(6)    | -128(3)     | 109(3)    |
| O12  | 1857(7)     | 4812(6)    | -844(2)     | 73.7(17)  |
| N1   | 7233(5)     | 1457(5)    | 4540.4(19)  | 36(1)     |
| N2   | 1720(8)     | 4874(7)    | -321(2)     | 60.7(17)  |
| C1   | 6910(5)     | 1465(5)    | 1907(2)     | 26.1(9)   |
| C2   | 7043(7)     | 1604(6)    | 716(3)      | 46.0(14)  |
| C3   | 9159(6)     | 1843(7)    | 1219(3)     | 48.0(15)  |
| C4   | 7052(5)     | 1129(4)    | 2995(2)     | 24.9(9)   |
| C5   | 6731(5)     | 3(5)       | 3064(2)     | 29.6(10)  |
| C6   | 6562(6)     | -639(5)    | 3617(2)     | 35.3(11)  |
| C7   | 6738(5)     | -169(5)    | 4099(2)     | 33.5(11)  |
| C8   | 7071(5)     | 936(5)     | 4023(2)     | 29.3(10)  |
| C9   | 7231(5)     | 1612(5)    | 3486(2)     | 26.5(9)   |
| C10  | 2678(5)     | 1820(5)    | 2113(2)     | 27.5(10)  |
| C11  | 7181(4)     | 1896(4)    | 2416(2)     | 24.8(9)   |
| C12  | 523(5)      | 1653(5)    | 2884(2)     | 33.8(11)  |
| C13  | 2012(5)     | 2854(5)    | 1696(2)     | 28.7(10)  |
| C14  | 2277(6)     | 2704(5)    | 1063(2)     | 33.5(11)  |
| C15  | 3059(6)     | 842(6)     | 3271(2)     | 38.8(12)  |
| C16  | 2926(9)     | 1551(7)    | 852(3)      | 57.5(18)  |
| C17  | 3160(11)    | 1495(9)    | 266(4)      | 75(3)     |
| C18  | 2743(10)    | 2577(9)    | -131(3)     | 67(2)     |
| C19  | 2112(7)     | 3707(7)    | 84(3)       | 46.8(15)  |
| C20  | 1862(6)     | 3788(6)    | 670(2)      | 37.5(12)  |
| Ag2  | 1028.3(3)   | 5557.4(4)  | 2768.25(15) | 30.75(12) |
| S3   | 3589.0(11)  | 5035.5(12) | 1804.9(5)   | 28.2(2)   |
| S4   | -1679.1(11) | 4884.9(11) | 2926.6(5)   | 25.0(2)   |
| O1   | -1188(4)    | 4895(4)    | 4085.7(15)  | 32.1(8)   |

|     |          |          |            |          |
|-----|----------|----------|------------|----------|
| O2  | -1379(4) | 7103(4)  | 5772.2(17) | 40.7(9)  |
| O3  | -243(5)  | 8418(4)  | 5707.9(18) | 44.2(10) |
| O4  | 4308(4)  | 3344(4)  | 2861.8(17) | 34.7(8)  |
| O5  | 4432(5)  | 1871(4)  | 4890(2)    | 47.1(11) |
| O6  | 4041(5)  | 3164(4)  | 5528.8(17) | 45.5(10) |
| N6  | 5518(9)  | 8540(12) | 1791(4)    | 54.9(15) |
| O18 | 5758(10) | 8379(11) | 2293(4)    | 61.9(8)  |
| O17 | 4413(9)  | 8610(11) | 1659(4)    | 61.9(8)  |
| O16 | 6336(9)  | 8675(11) | 1395(4)    | 61.9(8)  |
| N7  | 3788(11) | 8482(12) | 2332(5)    | 54.9(15) |
| O19 | 4937(10) | 8226(11) | 2480(5)    | 61.9(8)  |
| O21 | 2641(11) | 8528(12) | 2629(5)    | 61.9(8)  |
| O20 | 3827(12) | 8674(11) | 1785(4)    | 61.9(8)  |
| N8  | 1312(19) | 8920(20) | 2250(8)    | 54.9(15) |
| O23 | 1630(20) | 9380(20) | 1763(8)    | 61.9(8)  |
| O22 | 2040(20) | 8610(20) | 2657(9)    | 61.9(8)  |
| O24 | 206(18)  | 8860(20) | 2307(9)    | 61.9(8)  |
| N9  | -270(20) | 8580(20) | 1772(8)    | 54.9(15) |
| O27 | -870(20) | 8420(20) | 1392(8)    | 61.9(8)  |
| O26 | 702(19)  | 8990(20) | 1777(9)    | 61.9(8)  |
| O25 | -750(20) | 8280(20) | 2248(8)    | 61.9(8)  |
| N3  | 4118(5)  | 2945(5)  | 5028(2)    | 35.8(10) |
| N4  | -700(4)  | 7722(5)  | 5498.7(19) | 33.6(10) |
| C21 | 3087(5)  | 5454(5)  | 2508(2)    | 28.5(10) |
| C22 | 5122(5)  | 5402(6)  | 1637(2)    | 34.3(11) |
| C23 | 2502(6)  | 6308(6)  | 1366(2)    | 40.9(13) |
| C24 | 3725(5)  | 4461(5)  | 2949(2)    | 28.8(10) |
| C25 | 3622(5)  | 4775(5)  | 3560(2)    | 25.8(9)  |
| C26 | 3927(5)  | 3769(5)  | 3998(2)    | 27.9(10) |
| C27 | 3827(5)  | 4020(5)  | 4564(2)    | 28.5(10) |
| C28 | 3441(5)  | 5228(5)  | 4713(2)    | 29.8(10) |
| C29 | 3181(5)  | 6236(5)  | 4265(2)    | 31.5(10) |
| C30 | 3257(5)  | 6017(5)  | 3696(2)    | 28.4(10) |
| C31 | -1009(5) | 5988(5)  | 3141(2)    | 25.9(9)  |
| C32 | -3402(5) | 5346(6)  | 3168(2)    | 33.4(11) |
| C33 | -1764(5) | 5420(5)  | 2164(2)    | 28.7(10) |
| C34 | -951(5)  | 5794(5)  | 3771(2)    | 26.2(9)  |
| C35 | -585(5)  | 6778(5)  | 4030(2)    | 25.3(9)  |
| C36 | -763(5)  | 6753(5)  | 4632(2)    | 25.2(9)  |
| C37 | -116(5)  | 7717(5)  | 3693(2)    | 28.1(10) |
| C38 | 228(5)   | 8600(5)  | 3949(2)    | 32.4(11) |
| C39 | -440(5)  | 7673(5)  | 4870(2)    | 27.4(10) |
| C40 | 69(5)    | 8580(5)  | 4543(2)    | 32.2(11) |

|     |            |          |           |          |
|-----|------------|----------|-----------|----------|
| O13 | 4964(12)   | 4217(12) | -260(5)   | 61.9(8)  |
| O14 | 4682(11)   | 4162(11) | 619(5)    | 61.9(8)  |
| O15 | 4541(12)   | 5921(12) | 181(5)    | 61.9(8)  |
| N5  | 4809(10)   | 4727(12) | 130(5)    | 54.9(15) |
| O28 | 3879.3(18) | 8335(7)  | 556(2)    | 77.2(17) |
| O29 | 974(12)    | 9192(12) | 405(6)    | 77.2(17) |
| O30 | 18(15)     | 1454(16) | 9689(7)   | 77.2(17) |
| O31 | 1677(4)    | 9380(20) | 575.0(18) | 77.2(17) |

**Table S2.** Anisotropic Displacement Parameters ( $\text{\AA}^2 \times 10^3$ ) for fa-agmGau. The Anisotropic displacement factor exponent takes the form:  $-2\pi^2[h^2a^{*2}U_{11}+\dots+2hka \times b \times U_{12}]$

| Atom | $U_{11}$  | $U_{22}$ | $U_{33}$  | $U_{23}$   | $U_{13}$ | $U_{12}$   |
|------|-----------|----------|-----------|------------|----------|------------|
| Ag1  | 22.41(18) | 35.0(2)  | 31.07(19) | -10.27(14) | 0.88(13) | -9.42(14)  |
| S1   | 29.2(6)   | 33.1(6)  | 24.9(5)   | -5.9(4)    | 0.7(4)   | -6.8(5)    |
| S2   | 23.5(5)   | 34.6(6)  | 24.2(5)   | -4.0(4)    | -1.4(4)  | -6.9(4)    |
| O7   | 34.9(19)  | 27.8(17) | 27.2(16)  | -2.6(13)   | -1.6(14) | -15.7(14)  |
| O8   | 45(2)     | 55(3)    | 27.8(19)  | 0.1(17)    | -3.5(17) | -7(2)      |
| O9   | 59(3)     | 41(2)    | 36(2)     | -13.1(17)  | -3.1(19) | -12(2)     |
| O10  | 27.1(18)  | 39(2)    | 29.0(17)  | -4.7(14)   | -1.5(14) | -7.2(15)   |
| O11  | 205(8)    | 58(4)    | 47(3)     | 7(3)       | -25(4)   | -19(4)     |
| O12  | 113(5)    | 94(4)    | 25(2)     | 4(2)       | -9(3)    | -52(4)     |
| N1   | 31(2)     | 44(3)    | 28(2)     | -7.3(19)   | 0.8(17)  | -3.7(19)   |
| N2   | 91(5)     | 69(4)    | 29(3)     | 4(3)       | -11(3)   | -36(4)     |
| C1   | 25(2)     | 28(2)    | 26(2)     | -7.7(18)   | 2.7(17)  | -7.7(18)   |
| C2   | 59(4)     | 51(4)    | 30(3)     | -15(2)     | -6(3)    | -13(3)     |
| C3   | 29(3)     | 65(4)    | 40(3)     | 6(3)       | 7(2)     | -9(3)      |
| C4   | 21(2)     | 22(2)    | 29(2)     | -3.9(17)   | -0.4(17) | -4.3(17)   |
| C5   | 28(2)     | 23(2)    | 37(3)     | -4.3(19)   | -1.1(19) | -7.0(19)   |
| C6   | 34(3)     | 30(3)    | 39(3)     | 1(2)       | -2(2)    | -10(2)     |
| C7   | 29(3)     | 33(3)    | 32(3)     | 4(2)       | 2(2)     | -6(2)      |
| C8   | 26(2)     | 31(2)    | 26(2)     | -3.7(19)   | -0.4(18) | -2.5(19)   |
| C9   | 25(2)     | 26(2)    | 27(2)     | -5.7(18)   | 1.8(18)  | -6.1(18)   |
| C10  | 25(2)     | 34(2)    | 26(2)     | -5.9(19)   | 2.4(18)  | -13.3(19)  |
| C11  | 19(2)     | 25(2)    | 29(2)     | -4.9(17)   | 0.4(17)  | -3.9(17)   |
| C12  | 25(2)     | 42(3)    | 33(3)     | 0(2)       | 0.5(19)  | -12(2)     |
| C13  | 21(2)     | 40(3)    | 28(2)     | -5(2)      | -0.4(18) | -14(2)     |
| C14  | 36(3)     | 41(3)    | 27(2)     | -3(2)      | 0(2)     | -18(2)     |
| C15  | 30(3)     | 48(3)    | 30(3)     | 0(2)       | -5(2)    | -1(2)      |
| C16  | 82(5)     | 46(4)    | 39(3)     | -7(3)      | -4(3)    | -11(4)     |
| C17  | 108(8)    | 62(5)    | 47(4)     | -17(4)     | 4(4)     | -11(5)     |
| C18  | 105(7)    | 78(5)    | 26(3)     | -8(3)      | -2(3)    | -38(5)     |
| C19  | 62(4)     | 57(4)    | 29(3)     | -2(3)      | -5(3)    | -30(3)     |
| C20  | 45(3)     | 42(3)    | 29(3)     | -4(2)      | -5(2)    | -19(3)     |
| Ag2  | 19.08(18) | 46.8(2)  | 28.85(19) | -12.71(15) | 1.27(13) | -10.58(15) |
| S3   | 23.1(5)   | 37.7(6)  | 26.3(5)   | -12.8(5)   | 1.9(4)   | -9.8(5)    |
| S4   | 21.2(5)   | 30.4(5)  | 25.1(5)   | -6.7(4)    | -1.1(4)  | -8.5(4)    |
| O1   | 38(2)     | 35.0(19) | 27.3(17)  | -5.6(14)   | 1.0(14)  | -17.3(16)  |
| O2   | 38(2)     | 58(3)    | 29.9(19)  | -11.7(17)  | 7.0(16)  | -19.5(19)  |
| O3   | 53(3)     | 51(2)    | 37(2)     | -21.4(18)  | -2.4(18) | -21(2)     |
| O4   | 26.4(18)  | 39(2)    | 38(2)     | -18.5(16)  | -2.4(15) | -2.1(15)   |
| O5   | 53(3)     | 32(2)    | 51(2)     | -3.2(18)   | 16(2)    | -12.5(19)  |
| O6   | 51(3)     | 51(2)    | 30(2)     | -0.4(17)   | 2.9(17)  | -14(2)     |

|     |       |       |       |           |          |           |
|-----|-------|-------|-------|-----------|----------|-----------|
| N3  | 32(2) | 37(2) | 36(2) | -0.0(19)  | 6.7(18)  | -11.7(19) |
| N4  | 30(2) | 43(2) | 30(2) | -15.0(18) | -0.3(17) | -7.9(19)  |
| C21 | 20(2) | 42(3) | 27(2) | -15(2)    | 2.5(17)  | -10(2)    |
| C22 | 27(3) | 44(3) | 35(3) | -11(2)    | 4(2)     | -13(2)    |
| C23 | 36(3) | 54(3) | 31(3) | -9(2)     | -5(2)    | -7(3)     |
| C24 | 19(2) | 41(3) | 30(2) | -17(2)    | 1.8(17)  | -9(2)     |
| C25 | 19(2) | 33(2) | 29(2) | -13.0(19) | 2.2(17)  | -9.1(18)  |
| C26 | 20(2) | 34(2) | 32(2) | -12.7(19) | 6.3(18)  | -10.6(19) |
| C27 | 23(2) | 33(2) | 30(2) | -5.5(19)  | 2.3(18)  | -10.1(19) |
| C28 | 26(2) | 39(3) | 24(2) | -10.6(19) | -1.1(18) | -6(2)     |
| C29 | 32(3) | 30(2) | 31(3) | -12(2)    | -4(2)    | -2(2)     |
| C30 | 26(2) | 30(2) | 28(2) | -6.5(18)  | -2.9(18) | -3.9(19)  |
| C31 | 19(2) | 34(2) | 27(2) | -9.9(18)  | 0.3(17)  | -9.3(18)  |
| C32 | 23(2) | 47(3) | 36(3) | -13(2)    | 4.5(19)  | -18(2)    |
| C33 | 30(2) | 38(3) | 23(2) | -6.3(19)  | -1.4(18) | -15(2)    |
| C34 | 21(2) | 32(2) | 26(2) | -7.0(18)  | 1.1(17)  | -8.1(18)  |
| C35 | 19(2) | 28(2) | 29(2) | -6.6(18)  | -2.1(17) | -5.1(17)  |
| C36 | 21(2) | 28(2) | 27(2) | -6.7(18)  | -0.1(17) | -6.4(18)  |
| C37 | 26(2) | 29(2) | 29(2) | -4.0(18)  | -1.7(18) | -5.9(19)  |
| C38 | 31(3) | 29(2) | 38(3) | -6(2)     | 2(2)     | -11(2)    |
| C39 | 24(2) | 32(2) | 26(2) | -10.0(18) | -0.5(17) | -5.2(19)  |
| C40 | 27(2) | 28(2) | 43(3) | -14(2)    | -1(2)    | -7(2)     |

**Table S3.** Bond Lengths for fa-agmGau.

| Atom | Atom | Length/Å  | Atom | Atom | Length/Å  |
|------|------|-----------|------|------|-----------|
| Ag1  | C1   | 2.192(5)  | O1   | C34  | 1.224(6)  |
| Ag1  | C10  | 2.202(5)  | O2   | N4   | 1.216(6)  |
| S1   | C1   | 1.766(5)  | O3   | N4   | 1.225(6)  |
| S1   | C2   | 1.788(6)  | O4   | C24  | 1.249(6)  |
| S1   | C3   | 1.793(6)  | O5   | N3   | 1.230(6)  |
| S2   | C10  | 1.767(5)  | O6   | N3   | 1.226(6)  |
| S2   | C12  | 1.795(5)  | N6   | O18  | 1.207(8)  |
| S2   | C15  | 1.791(5)  | N6   | O17  | 1.225(8)  |
| O7   | C11  | 1.243(6)  | N6   | O16  | 1.220(8)  |
| O8   | N1   | 1.228(6)  | N7   | O19  | 1.241(12) |
| O9   | N1   | 1.226(7)  | N7   | O21  | 1.323(12) |
| O10  | C13  | 1.245(7)  | N7   | O20  | 1.265(13) |
| O11  | N2   | 1.206(9)  | N8   | O23  | 1.232(16) |
| O12  | N2   | 1.228(8)  | N8   | O22  | 1.236(16) |
| N1   | C8   | 1.476(7)  | N8   | O24  | 1.189(16) |
| N2   | C19  | 1.461(9)  | N9   | O27  | 1.217(16) |
| C1   | C11  | 1.447(7)  | N9   | O26  | 1.259(16) |
| C4   | C5   | 1.387(7)  | N9   | O25  | 1.218(16) |
| C4   | C9   | 1.403(7)  | N3   | C27  | 1.468(7)  |
| C4   | C11  | 1.501(7)  | N4   | C39  | 1.473(6)  |
| C5   | C6   | 1.400(7)  | C21  | C24  | 1.445(8)  |
| C6   | C7   | 1.374(8)  | C24  | C25  | 1.514(6)  |
| C7   | C8   | 1.371(8)  | C25  | C26  | 1.380(7)  |
| C8   | C9   | 1.382(7)  | C25  | C30  | 1.401(7)  |
| C10  | C13  | 1.443(7)  | C26  | C27  | 1.384(7)  |
| C13  | C14  | 1.505(7)  | C27  | C28  | 1.377(7)  |
| C14  | C16  | 1.400(9)  | C28  | C29  | 1.394(8)  |
| C14  | C20  | 1.384(8)  | C29  | C30  | 1.384(7)  |
| C16  | C17  | 1.375(10) | C31  | C34  | 1.464(6)  |
| C17  | C18  | 1.390(12) | C34  | C35  | 1.507(7)  |
| C18  | C19  | 1.380(11) | C35  | C36  | 1.400(7)  |
| C19  | C20  | 1.381(8)  | C35  | C37  | 1.396(7)  |
| Ag2  | C21  | 2.177(5)  | C36  | C39  | 1.394(7)  |
| Ag2  | C31  | 2.177(5)  | C37  | C38  | 1.393(7)  |
| S3   | C21  | 1.763(5)  | C38  | C40  | 1.380(8)  |
| S3   | C22  | 1.789(5)  | C39  | C40  | 1.383(8)  |
| S3   | C23  | 1.789(6)  | O13  | N5   | 1.125(18) |
| S4   | C31  | 1.766(5)  | O14  | N5   | 1.231(16) |
| S4   | C32  | 1.792(5)  | O15  | N5   | 1.300(18) |
| S4   | C33  | 1.794(5)  |      |      |           |

**Table S4.** Bond Angles for fa-agmGau.

| Atom Atom Atom |     |     | Angle/°    | Atom Atom Atom |     |     | Angle/°   |
|----------------|-----|-----|------------|----------------|-----|-----|-----------|
| C1             | Ag1 | C10 | 168.19(19) | O18            | N6  | O16 | 122.3(8)  |
| C1             | S1  | C2  | 101.9(3)   | O16            | N6  | O17 | 117.2(8)  |
| C1             | S1  | C3  | 105.5(3)   | O19            | N7  | O21 | 132.8(12) |
| C2             | S1  | C3  | 100.8(3)   | O19            | N7  | O20 | 107.9(11) |
| C10            | S2  | C12 | 103.0(2)   | O20            | N7  | O21 | 119.2(11) |
| C10            | S2  | C15 | 102.9(3)   | O23            | N8  | O22 | 123.5(19) |
| C15            | S2  | C12 | 101.3(3)   | O24            | N8  | O23 | 114.3(18) |
| O8             | N1  | C8  | 118.0(5)   | O24            | N8  | O22 | 122.1(19) |
| O9             | N1  | O8  | 124.1(5)   | O27            | N9  | O26 | 134(2)    |
| O9             | N1  | C8  | 117.9(4)   | O27            | N9  | O25 | 110.6(18) |
| O11            | N2  | O12 | 122.3(7)   | O25            | N9  | O26 | 114.9(18) |
| O11            | N2  | C19 | 118.5(6)   | O5             | N3  | C27 | 117.8(5)  |
| O12            | N2  | C19 | 119.2(7)   | O6             | N3  | O5  | 123.8(5)  |
| S1             | C1  | Ag1 | 111.0(2)   | O6             | N3  | C27 | 118.4(5)  |
| C11            | C1  | Ag1 | 102.2(3)   | O2             | N4  | O3  | 124.3(5)  |
| C11            | C1  | S1  | 110.3(3)   | O2             | N4  | C39 | 118.5(4)  |
| C5             | C4  | C9  | 119.5(5)   | O3             | N4  | C39 | 117.2(5)  |
| C5             | C4  | C11 | 123.3(4)   | S3             | C21 | Ag2 | 113.2(2)  |
| C9             | C4  | C11 | 117.2(4)   | C24            | C21 | Ag2 | 99.2(3)   |
| C4             | C5  | C6  | 120.6(5)   | C24            | C21 | S3  | 111.9(4)  |
| C7             | C6  | C5  | 120.1(5)   | O4             | C24 | C21 | 123.9(4)  |
| C8             | C7  | C6  | 118.5(5)   | O4             | C24 | C25 | 117.9(5)  |
| C7             | C8  | N1  | 118.6(5)   | C21            | C24 | C25 | 118.0(4)  |
| C7             | C8  | C9  | 123.5(5)   | C26            | C25 | C24 | 117.0(4)  |
| C9             | C8  | N1  | 117.9(5)   | C26            | C25 | C30 | 119.5(4)  |
| C8             | C9  | C4  | 117.8(5)   | C30            | C25 | C24 | 123.4(5)  |
| S2             | C10 | Ag1 | 109.5(2)   | C25            | C26 | C27 | 118.7(5)  |
| C13            | C10 | Ag1 | 104.1(3)   | C26            | C27 | N3  | 118.4(5)  |
| C13            | C10 | S2  | 109.5(4)   | C28            | C27 | N3  | 118.4(5)  |
| O7             | C11 | C1  | 122.1(4)   | C28            | C27 | C26 | 123.2(5)  |
| O7             | C11 | C4  | 119.5(4)   | C27            | C28 | C29 | 117.6(5)  |
| C1             | C11 | C4  | 118.4(4)   | C30            | C29 | C28 | 120.5(5)  |
| O10            | C13 | C10 | 122.6(5)   | C29            | C30 | C25 | 120.4(5)  |
| O10            | C13 | C14 | 118.9(5)   | S4             | C31 | Ag2 | 106.3(2)  |
| C10            | C13 | C14 | 118.5(5)   | C34            | C31 | Ag2 | 107.0(3)  |
| C16            | C14 | C13 | 124.1(5)   | C34            | C31 | S4  | 110.2(4)  |
| C20            | C14 | C13 | 117.1(5)   | O1             | C34 | C31 | 123.4(5)  |
| C20            | C14 | C16 | 118.7(5)   | O1             | C34 | C35 | 120.1(4)  |
| C17            | C16 | C14 | 120.8(7)   | C31            | C34 | C35 | 116.5(4)  |
| C16            | C17 | C18 | 120.9(8)   | C36            | C35 | C34 | 117.6(4)  |
| C19            | C18 | C17 | 117.6(6)   | C37            | C35 | C34 | 122.7(4)  |

|     |     |     |            |     |     |     |           |
|-----|-----|-----|------------|-----|-----|-----|-----------|
| C18 | C19 | N2  | 119.1(6)   | C37 | C35 | C36 | 119.6(4)  |
| C18 | C19 | C20 | 122.6(6)   | C39 | C36 | C35 | 117.6(5)  |
| C20 | C19 | N2  | 118.3(6)   | C38 | C37 | C35 | 121.0(5)  |
| C19 | C20 | C14 | 119.4(6)   | C40 | C38 | C37 | 120.1(5)  |
| C31 | Ag2 | C21 | 167.05(18) | C36 | C39 | N4  | 118.7(5)  |
| C21 | S3  | C22 | 103.7(2)   | C40 | C39 | N4  | 117.9(4)  |
| C21 | S3  | C23 | 102.3(3)   | C40 | C39 | C36 | 123.3(5)  |
| C23 | S3  | C22 | 101.0(3)   | C38 | C40 | C39 | 118.4(5)  |
| C31 | S4  | C32 | 106.2(2)   | O13 | N5  | O14 | 120.0(14) |
| C31 | S4  | C33 | 100.5(2)   | O13 | N5  | O15 | 131.9(14) |
| C32 | S4  | C33 | 101.1(3)   | O14 | N5  | O15 | 107.3(13) |
| O18 | N6  | O17 | 120.5(8)   |     |     |     |           |



**Table S5.** Hydrogen Atom Coordinates ( $\text{\AA} \times 10^4$ ) and Isotropic Displacement Parameters ( $\text{\AA}^2 \times 10^3$ ) for fa-agmGau.

| Atom | x     | y     | z    | U(eq) |
|------|-------|-------|------|-------|
| H1   | 7358  | 557   | 1905 | 31    |
| H2A  | 7425  | 703   | 800  | 69    |
| H2B  | 7422  | 1901  | 350  | 69    |
| H2C  | 6102  | 1803  | 699  | 69    |
| H3A  | 9479  | 2121  | 1526 | 72    |
| H3B  | 9477  | 2197  | 852  | 72    |
| H3C  | 9474  | 934   | 1252 | 72    |
| H5   | 6628  | -329  | 2739 | 36    |
| H6   | 6330  | -1384 | 3659 | 42    |
| H7   | 6633  | -590  | 4469 | 40    |
| H9   | 7450  | 2363  | 3452 | 32    |
| H10  | 2613  | 1011  | 2032 | 33    |
| H12A | -115  | 2247  | 2638 | 51    |
| H12B | 163   | 1637  | 3279 | 51    |
| H12C | 730   | 824   | 2770 | 51    |
| H15A | 3179  | 59    | 3124 | 58    |
| H15B | 2658  | 801   | 3659 | 58    |
| H15C | 3905  | 981   | 3272 | 58    |
| H16  | 3202  | 815   | 1111 | 69    |
| H17  | 3604  | 722   | 134  | 90    |
| H18  | 2884  | 2541  | -528 | 81    |
| H20  | 1419  | 4563  | 800  | 45    |
| H21  | 3252  | 6251  | 2544 | 34    |
| H22A | 5008  | 6242  | 1719 | 51    |
| H22B | 5388  | 5354  | 1233 | 51    |
| H22C | 5792  | 4805  | 1867 | 51    |
| H23A | 1602  | 6310  | 1468 | 61    |
| H23B | 2723  | 6200  | 965  | 61    |
| H23C | 2600  | 7099  | 1430 | 61    |
| H26  | 4193  | 2939  | 3915 | 34    |
| H28  | 3357  | 5366  | 5098 | 36    |
| H29  | 2956  | 7063  | 4350 | 38    |
| H30  | 3063  | 6697  | 3402 | 34    |
| H31  | -1521 | 6859  | 3004 | 31    |
| H32A | -3491 | 5212  | 3583 | 50    |
| H32B | -3841 | 4847  | 3016 | 50    |
| H32C | -3798 | 6227  | 3033 | 50    |
| H33A | -2290 | 6293  | 2105 | 43    |
| H33B | -2161 | 4918  | 1991 | 43    |
| H33C | -885  | 5337  | 1988 | 43    |

|      |          |           |          |     |
|------|----------|-----------|----------|-----|
| H36  | -1085    | 6144      | 4866     | 30  |
| H37  | -32      | 7753      | 3291     | 34  |
| H38  | 565      | 9203      | 3720     | 39  |
| H40  | 298      | 9163      | 4719     | 39  |
| H28A | 4691     | 8274      | 512      | 116 |
| H28B | 3477     | 8804      | 275      | 116 |
| H29A | 510(130) | 9960(40)  | 360(90)  | 116 |
| H29B | 490(130) | 8720(110) | 420(110) | 116 |
| H30A | 20(120)  | 1700(200) | 9328(14) | 116 |
| H30B | 650(160) | 1600(200) | 9820(70) | 116 |
| H31A | 1303     | 9438      | 909      | 116 |
| H31B | 2491     | 9281      | 580      | 116 |

**[Ag(Me<sub>2</sub>SCHC(O)C<sub>6</sub>H<sub>4</sub>-*p*-NO<sub>2</sub>)<sub>2</sub>]<sub>2</sub>[{AgNO<sub>3</sub>(μ-NO<sub>3</sub>)(Me<sub>2</sub>SCHC(O)C<sub>6</sub>H<sub>4</sub>-*p*-NO<sub>2</sub>)<sub>2</sub>]<sub>2</sub>. 2CH<sub>3</sub>OH (3)**

**Table S1.** Fractional Atomic Coordinates ( $\times 10^4$ ) and Equivalent Isotropic Displacement Parameters ( $\text{\AA}^2 \times 10^3$ ) for fa-asng.  $U_{\text{eq}}$  is defined as 1/3 of the trace of the orthogonalised  $U_{\text{H}}$  tensor.

| Atom | <i>x</i>    | <i>y</i>    | <i>z</i>    | $U_{\text{eq}}$ |
|------|-------------|-------------|-------------|-----------------|
| Ag1  | 3111.78(18) | 3903.35(18) | 1415.91(16) | 22.41(6)        |
| Ag2  | 4765.3(2)   | 1749.73(19) | 4536.84(18) | 29.38(7)        |
| S1   | 1260.1(6)   | 5843.2(6)   | 1292.0(5)   | 21.66(14)       |
| S2   | 6072.7(6)   | 4073.7(6)   | 1028.7(5)   | 20.22(14)       |
| S3   | 3128.9(6)   | 3815.6(6)   | 4915.2(5)   | 23.32(14)       |
| O1   | 1368.6(17)  | 4577.7(17)  | -61.2(14)   | 24.1(4)         |
| O2   | -2065(3)    | -944(2)     | 2716.7(19)  | 49.1(7)         |
| O3   | -696(3)     | -1103(2)    | 1369(2)     | 65.1(8)         |
| O4   | 5737.0(17)  | 3816.0(17)  | -675.9(14)  | 25.5(4)         |
| O5   | 2410(3)     | -1622(2)    | 617(2)      | 76.5(10)        |
| O6   | 2666(3)     | -652(2)     | -868(2)     | 63.8(8)         |
| O7   | 2582.5(18)  | 3358.2(16)  | 3416.7(15)  | 25.6(4)         |
| O8   | 607(2)      | -2630(2)    | 4687.3(19)  | 44.0(6)         |
| O9   | 403(2)      | -1649(2)    | 3301.7(19)  | 42.7(6)         |
| O10  | 6902.4(19)  | 2349.6(18)  | 3835.9(16)  | 32.1(5)         |
| O11  | 6156(2)     | 3853(2)     | 4159(2)     | 47.1(6)         |
| O12  | 8136(2)     | 3787(2)     | 3566.7(19)  | 49.4(7)         |
| O13  | 5057(2)     | 1147(2)     | 6372(2)     | 54.7(7)         |
| O14  | 4393(3)     | -209(2)     | 6068(2)     | 56.2(8)         |
| O15  | 5153(3)     | -602(3)     | 7197(2)     | 64.2(8)         |
| N1   | -1165(3)    | -568(2)     | 1939(2)     | 39.2(7)         |
| N2   | 2766(2)     | -757(2)     | -95(2)      | 32.0(6)         |
| N3   | 708(2)      | -1728(2)    | 4007(2)     | 31.8(6)         |
| N4   | 7066(2)     | 3339(2)     | 3852.4(18)  | 30.2(6)         |
| N5   | 4869(2)     | 103(2)      | 6570.2(19)  | 29.9(6)         |
| C1   | 1211(2)     | 4343(2)     | 1588(2)     | 18.9(5)         |
| C2   | 1068(2)     | 3973(2)     | 828(2)      | 18.2(5)         |
| C3   | 511(2)      | 2752(2)     | 1166(2)     | 18.6(5)         |
| C4   | 975(3)      | 2125(2)     | 522(2)      | 24.2(6)         |
| C5   | 434(3)      | 1033(3)     | 777(2)      | 27.8(6)         |
| C6   | -584(3)     | 599(2)      | 1666(2)     | 25.4(6)         |
| C7   | -1082(3)    | 1202(2)     | 2309(2)     | 23.5(6)         |
| C8   | -509(2)     | 2281(2)     | 2059(2)     | 20.1(5)         |
| C9   | 1518(3)     | 6010(3)     | 2323(2)     | 27.1(6)         |
| C10  | -327(3)     | 6127(3)     | 1596(2)     | 30.9(7)         |
| C11  | 4897(2)     | 3161(2)     | 1103(2)     | 19.5(5)         |

|     |         |         |            |         |
|-----|---------|---------|------------|---------|
| C12 | 5097(2) | 3085(2) | 134(2)     | 19.0(5) |
| C13 | 4444(2) | 2056(2) | 120(2)     | 21.1(6) |
| C14 | 4456(3) | 2080(3) | -796(2)    | 27.8(6) |
| C15 | 3907(3) | 1157(3) | -875(2)    | 30.4(7) |
| C16 | 3362(3) | 222(2)  | -22(2)     | 25.6(6) |
| C17 | 3350(3) | 152(3)  | 897(2)     | 30.3(7) |
| C18 | 3895(3) | 1087(2) | 958(2)     | 28.0(6) |
| C19 | 7097(3) | 3085(3) | 1403(2)    | 26.8(6) |
| C20 | 5414(3) | 4453(3) | 2130(2)    | 30.7(7) |
| C21 | 2917(3) | 2426(2) | 4896(2)    | 22.9(6) |
| C22 | 2543(2) | 2453(2) | 4097(2)    | 21.2(5) |
| C23 | 2093(2) | 1327(2) | 4096(2)    | 22.3(6) |
| C24 | 2138(3) | 255(2)  | 4769(2)    | 27.2(6) |
| C25 | 1682(3) | -750(3) | 4751(2)    | 28.0(6) |
| C26 | 1202(3) | -671(2) | 4039(2)    | 25.8(6) |
| C27 | 1167(3) | 368(3)  | 3350(2)    | 28.7(6) |
| C28 | 1597(3) | 1364(2) | 3394(2)    | 26.3(6) |
| C29 | 1595(3) | 4229(3) | 5399(3)    | 33.7(7) |
| C30 | 3533(3) | 3517(3) | 5982(2)    | 34.5(7) |
| O16 | 6660(2) | 1962(2) | 7060.4(18) | 41.6(6) |
| C31 | 6588(3) | 3095(3) | 6511(3)    | 42.7(8) |

**Table S2.** Anisotropic Displacement Parameters ( $\text{\AA}^2 \times 10^3$ ) for fa-asng. The Anisotropic displacement factor exponent takes the form:  $-2\pi^2[h^2a^{*2}U_{11}+\dots+2hka \times b \times U_{12}]$

| Atom | $U_{11}$  | $U_{22}$  | $U_{33}$  | $U_{23}$  | $U_{13}$   | $U_{12}$  |
|------|-----------|-----------|-----------|-----------|------------|-----------|
| Ag1  | 19.42(10) | 25.63(12) | 28.83(12) | -14.26(9) | -12.45(9)  | 5.70(8)   |
| Ag2  | 34.83(13) | 19.68(12) | 39.71(14) | -9.68(10) | -21.61(11) | 6.39(9)   |
| S1   | 27.0(3)   | 16.5(3)   | 21.8(3)   | -7.6(3)   | -8.6(3)    | 0.3(3)    |
| S2   | 20.2(3)   | 17.4(3)   | 23.4(3)   | -2.9(3)   | -12.2(3)   | -0.6(2)   |
| S3   | 29.2(3)   | 15.1(3)   | 25.7(4)   | -7.0(3)   | -10.4(3)   | -0.3(3)   |
| O1   | 26(1)     | 23.0(11)  | 22.7(10)  | -3.9(8)   | -11.8(9)   | -3.2(8)   |
| O2   | 74.4(18)  | 27.9(13)  | 36.7(14)  | -0.2(11)  | -19.4(14)  | -22.9(13) |
| O3   | 122(2)    | 24.1(14)  | 45.6(16)  | -18.6(12) | -21.1(16)  | -8.2(15)  |
| O4   | 26.8(10)  | 22.2(11)  | 23.6(11)  | -8.1(9)   | -4.6(9)    | -3.2(8)   |
| O5   | 133(3)    | 31.3(15)  | 68(2)     | -0.8(14)  | -53(2)     | -34.0(17) |
| O6   | 93(2)     | 52.9(18)  | 63.2(19)  | -22.4(15) | -45.3(18)  | -17.8(16) |
| O7   | 32.5(11)  | 18(1)     | 27.8(11)  | -5.6(9)   | -15.0(9)   | 1.4(8)    |
| O8   | 51.4(14)  | 23.1(13)  | 56.6(16)  | -9.1(12)  | -23.1(13)  | -6.4(11)  |
| O9   | 52.6(14)  | 34.3(14)  | 57.5(16)  | -21.1(12) | -33.8(13)  | 1.3(11)   |
| O10  | 36.7(11)  | 21.9(11)  | 40.2(13)  | -15.3(10) | -13.3(10)  | -1.1(9)   |
| O11  | 51.7(15)  | 27.8(13)  | 70.5(18)  | -25.9(13) | -25.6(14)  | 11.4(11)  |
| O12  | 39.9(13)  | 50.8(16)  | 53.4(16)  | -32.8(14) | 1.4(12)    | -18.5(12) |
| O13  | 57.5(16)  | 22.0(13)  | 96(2)     | -18.8(14) | -43.2(16)  | 3.5(11)   |
| O14  | 66.7(17)  | 51.5(17)  | 94(2)     | -53.2(17) | -54.2(17)  | 27.6(14)  |
| O15  | 65.1(18)  | 56.6(19)  | 53.7(17)  | 14.7(14)  | -33.6(15)  | 7.3(15)   |
| N1   | 71(2)     | 18.2(14)  | 33.7(16)  | -4.4(12)  | -29.3(16)  | -3.6(14)  |
| N2   | 32.7(13)  | 23.5(14)  | 50.5(17)  | -16.5(13) | -24.5(13)  | 5.3(11)   |
| N3   | 30.7(13)  | 22.1(14)  | 46.8(17)  | -15.1(12) | -16.2(13)  | -0.5(11)  |
| N4   | 41.9(15)  | 23.0(14)  | 24.7(13)  | -9.4(11)  | -10.2(12)  | -2.7(11)  |
| N5   | 35.0(14)  | 20.7(13)  | 34.8(15)  | -6.9(11)  | -16.6(12)  | 3.9(11)   |
| C1   | 18.0(12)  | 15.3(13)  | 23.0(14)  | -7.1(11)  | -7.0(11)   | 0.4(10)   |
| C2   | 13.7(11)  | 18.2(13)  | 26.1(14)  | -9.3(11)  | -10.2(11)  | 4.8(10)   |
| C3   | 20.3(12)  | 15.3(13)  | 25.9(14)  | -7.3(11)  | -15.0(12)  | 5.6(10)   |
| C4   | 25.7(14)  | 23.0(15)  | 26.5(15)  | -10.3(12) | -11.3(12)  | 4.8(11)   |
| C5   | 40.5(16)  | 22.6(15)  | 32.1(17)  | -17.5(13) | -20.3(14)  | 12.6(13)  |
| C6   | 40.8(16)  | 12.5(13)  | 28.4(16)  | -5.0(11)  | -20.8(14)  | 0.7(12)   |
| C7   | 28.8(14)  | 20.6(14)  | 20.5(14)  | -2.7(11)  | -12.2(12)  | -2.5(11)  |
| C8   | 23.0(13)  | 18.9(14)  | 23.3(14)  | -9.5(11)  | -12.2(12)  | 3.7(11)   |
| C9   | 29.7(14)  | 28.4(16)  | 31.1(16)  | -18.0(13) | -13.4(13)  | 2.9(12)   |
| C10  | 35.8(16)  | 26.9(17)  | 42.8(19)  | -17.3(14) | -25.2(15)  | 14.7(13)  |
| C11  | 20.1(12)  | 14.0(13)  | 24.2(14)  | -4.2(11)  | -10.4(11)  | -0(1)     |
| C12  | 16.8(12)  | 15.5(13)  | 25.5(14)  | -7.6(11)  | -8.6(11)   | 4.1(10)   |
| C13  | 19.8(12)  | 18.3(14)  | 27.6(15)  | -10.6(12) | -9.6(12)   | 5.5(10)   |
| C14  | 31.6(15)  | 25.9(16)  | 23.0(15)  | -10.0(13) | -5.6(13)   | -2.2(12)  |
| C15  | 32.3(15)  | 35.0(18)  | 32.6(17)  | -20.7(14) | -14.1(14)  | 4.3(13)   |

|     |          |          |          |           |           |          |
|-----|----------|----------|----------|-----------|-----------|----------|
| C16 | 24.2(14) | 17.9(14) | 40.7(18) | -14.7(13) | -15.2(13) | 5.2(11)  |
| C17 | 40.3(17) | 17.4(15) | 34.9(17) | -3.9(13)  | -20.1(15) | -2.8(12) |
| C18 | 38.8(16) | 18.9(15) | 29.7(16) | -7.0(12)  | -17.9(14) | 0.3(12)  |
| C19 | 22.1(13) | 25.7(16) | 30.0(16) | -1.0(12)  | -14.8(13) | 3.0(11)  |
| C20 | 35.1(16) | 32.3(18) | 35.4(17) | -16.6(14) | -20.5(14) | 2.5(13)  |
| C21 | 31.1(14) | 15.0(13) | 21.8(14) | -6.2(11)  | -9.2(12)  | -1.1(11) |
| C22 | 21.3(13) | 19.0(14) | 22.8(14) | -7.3(11)  | -7.8(11)  | 2.8(11)  |
| C23 | 22.4(13) | 20.9(14) | 23.7(14) | -8.2(12)  | -8.4(12)  | 1.4(11)  |
| C24 | 38.5(16) | 20.4(15) | 24.0(15) | -4.9(12)  | -15.6(13) | -0.6(12) |
| C25 | 35.0(16) | 18.1(15) | 29.3(16) | -5.1(12)  | -13.2(14) | 1.1(12)  |
| C26 | 24.6(14) | 19.5(15) | 36.1(17) | -13.3(13) | -11.3(13) | 1.2(11)  |
| C27 | 32.0(15) | 25.3(16) | 37.3(17) | -11.7(13) | -21.8(14) | 4.6(12)  |
| C28 | 31.1(15) | 19.3(14) | 31.8(16) | -6.1(12)  | -17.8(13) | 3.5(12)  |
| C29 | 31.7(16) | 27.8(17) | 42.3(19) | -18.4(15) | -9.1(15)  | 1.0(13)  |
| C30 | 56(2)    | 24.2(16) | 31.9(17) | -12.2(13) | -23.6(16) | -0.2(14) |
| O16 | 46.5(14) | 37.8(15) | 40.5(14) | -10.4(11) | -19.1(12) | 1.5(11)  |
| C31 | 57(2)    | 40(2)    | 41(2)    | -14.9(17) | -27.3(18) | 3.5(17)  |

**Tble S3.** Bond Lengths for fa-asng.

| <b>Atom</b> | <b>Atom</b>      | <b>Length/Å</b> | <b>Atom</b> | <b>Atom</b> | <b>Length/Å</b> |
|-------------|------------------|-----------------|-------------|-------------|-----------------|
| Ag1         | C1               | 2.215(2)        | O15         | N5          | 1.208(3)        |
| Ag1         | C11              | 2.206(3)        | N1          | C6          | 1.476(4)        |
| Ag2         | O10              | 2.359(2)        | N2          | C16         | 1.476(4)        |
| Ag2         | O14              | 2.668(3)        | N3          | C26         | 1.472(4)        |
| Ag2         | O14 <sup>1</sup> | 2.414(2)        | C1          | C2          | 1.448(3)        |
| Ag2         | C21              | 2.233(3)        | C2          | C3          | 1.508(4)        |
| S1          | C1               | 1.758(3)        | C3          | C4          | 1.397(4)        |
| S1          | C9               | 1.790(3)        | C3          | C8          | 1.390(4)        |
| S1          | C10              | 1.794(3)        | C4          | C5          | 1.381(4)        |
| S2          | C11              | 1.758(2)        | C5          | C6          | 1.382(4)        |
| S2          | C19              | 1.795(3)        | C6          | C7          | 1.377(4)        |
| S2          | C20              | 1.786(3)        | C7          | C8          | 1.383(4)        |
| S3          | C21              | 1.759(3)        | C11         | C12         | 1.449(4)        |
| S3          | C29              | 1.799(3)        | C12         | C13         | 1.519(4)        |
| S3          | C30              | 1.789(3)        | C13         | C14         | 1.389(4)        |
| O1          | C2               | 1.234(3)        | C13         | C18         | 1.384(4)        |
| O2          | N1               | 1.214(4)        | C14         | C15         | 1.391(4)        |
| O3          | N1               | 1.226(4)        | C15         | C16         | 1.372(4)        |
| O4          | C12              | 1.236(3)        | C16         | C17         | 1.376(4)        |
| O5          | N2               | 1.195(4)        | C17         | C18         | 1.387(4)        |
| O6          | N2               | 1.196(3)        | C21         | C22         | 1.437(4)        |
| O7          | C22              | 1.240(3)        | C22         | C23         | 1.508(4)        |
| O8          | N3               | 1.223(3)        | C23         | C24         | 1.400(4)        |
| O9          | N3               | 1.234(3)        | C23         | C28         | 1.388(4)        |
| O10         | N4               | 1.256(3)        | C24         | C25         | 1.384(4)        |
| O11         | N4               | 1.242(3)        | C25         | C26         | 1.378(4)        |
| O12         | N4               | 1.244(3)        | C26         | C27         | 1.379(4)        |
| O13         | N5               | 1.234(3)        | C27         | C28         | 1.379(4)        |
| O14         | Ag2 <sup>1</sup> | 2.414(2)        | O16         | C31         | 1.396(4)        |
| O14         | N5               | 1.259(3)        |             |             |                 |

<sup>1</sup>I-X,-Y,I-Z

**Table S4.** Bond Angles for fa-asng.

| Atom             | Atom | Atom             | Angle/°    | Atom | Atom | Atom | Angle/°    |
|------------------|------|------------------|------------|------|------|------|------------|
| C11              | Ag1  | C1               | 166.14(9)  | C8   | C3   | C2   | 121.5(2)   |
| O10              | Ag2  | O14              | 106.76(8)  | C8   | C3   | C4   | 119.9(2)   |
| O10              | Ag2  | O14 <sup>1</sup> | 78.88(8)   | C5   | C4   | C3   | 120.0(3)   |
| O14 <sup>1</sup> | Ag2  | O14              | 69.54(11)  | C4   | C5   | C6   | 118.3(3)   |
| C21              | Ag2  | O10              | 142.08(9)  | C5   | C6   | N1   | 118.4(3)   |
| C21              | Ag2  | O14 <sup>1</sup> | 133.70(9)  | C7   | C6   | N1   | 118.4(3)   |
| C21              | Ag2  | O14              | 103.74(9)  | C7   | C6   | C5   | 123.2(3)   |
| C1               | S1   | C9               | 101.50(13) | C6   | C7   | C8   | 117.9(3)   |
| C1               | S1   | C10              | 104.26(13) | C7   | C8   | C3   | 120.6(3)   |
| C9               | S1   | C10              | 100.68(14) | S2   | C11  | Ag1  | 112.06(13) |
| C11              | S2   | C19              | 102.82(13) | C12  | C11  | Ag1  | 99.61(16)  |
| C11              | S2   | C20              | 104.45(13) | C12  | C11  | S2   | 111.58(19) |
| C20              | S2   | C19              | 98.68(14)  | O4   | C12  | C11  | 124.2(2)   |
| C21              | S3   | C29              | 105.29(14) | O4   | C12  | C13  | 118.3(2)   |
| C21              | S3   | C30              | 101.69(14) | C11  | C12  | C13  | 117.5(2)   |
| C30              | S3   | C29              | 100.41(16) | C14  | C13  | C12  | 117.5(2)   |
| N4               | O10  | Ag2              | 109.49(18) | C18  | C13  | C12  | 123.4(2)   |
| Ag2 <sup>1</sup> | O14  | Ag2              | 110.46(11) | C18  | C13  | C14  | 119.1(3)   |
| N5               | O14  | Ag2              | 100.61(19) | C13  | C14  | C15  | 120.9(3)   |
| N5               | O14  | Ag2 <sup>1</sup> | 118.19(19) | C16  | C15  | C14  | 117.8(3)   |
| O2               | N1   | O3               | 124.0(3)   | C15  | C16  | N2   | 118.3(3)   |
| O2               | N1   | C6               | 118.3(3)   | C15  | C16  | C17  | 123.2(3)   |
| O3               | N1   | C6               | 117.7(3)   | C17  | C16  | N2   | 118.5(3)   |
| O5               | N2   | O6               | 122.9(3)   | C16  | C17  | C18  | 117.8(3)   |
| O5               | N2   | C16              | 118.5(3)   | C13  | C18  | C17  | 121.1(3)   |
| O6               | N2   | C16              | 118.5(3)   | S3   | C21  | Ag2  | 107.01(13) |
| O8               | N3   | O9               | 123.7(3)   | C22  | C21  | Ag2  | 105.57(18) |
| O8               | N3   | C26              | 118.2(3)   | C22  | C21  | S3   | 111.5(2)   |
| O9               | N3   | C26              | 118.1(3)   | O7   | C22  | C21  | 122.6(2)   |
| O11              | N4   | O10              | 119.4(3)   | O7   | C22  | C23  | 119.5(2)   |
| O11              | N4   | O12              | 120.9(3)   | C21  | C22  | C23  | 117.8(2)   |
| O12              | N4   | O10              | 119.6(3)   | C24  | C23  | C22  | 123.4(2)   |
| O13              | N5   | O14              | 117.0(3)   | C28  | C23  | C22  | 117.8(2)   |
| O15              | N5   | O13              | 122.4(3)   | C28  | C23  | C24  | 118.7(3)   |
| O15              | N5   | O14              | 120.5(3)   | C25  | C24  | C23  | 120.9(3)   |
| S1               | C1   | Ag1              | 106.22(12) | C26  | C25  | C24  | 118.3(3)   |
| C2               | C1   | Ag1              | 99.95(16)  | C25  | C26  | N3   | 119.3(3)   |
| C2               | C1   | S1               | 112.85(19) | C25  | C26  | C27  | 122.4(3)   |
| O1               | C2   | C1               | 124.9(2)   | C27  | C26  | N3   | 118.4(3)   |
| O1               | C2   | C3               | 118.7(2)   | C26  | C27  | C28  | 118.6(3)   |
| C1               | C2   | C3               | 116.4(2)   | C27  | C28  | C23  | 121.0(3)   |



C4 C3 C2            118.4 (2)  
1-X,-Y,1-Z

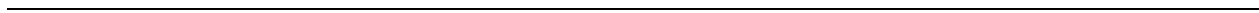

**Table S5.** Hydrogen Atom Coordinates ( $\text{\AA} \times 10^4$ ) and Isotropic Displacement Parameters ( $\text{\AA}^2 \times 10^3$ ) for fa-asng.

| Atom | x        | y        | z        | U(eq) |
|------|----------|----------|----------|-------|
| H1   | 587      | 3919     | 2273     | 23    |
| H4   | 1664     | 2451     | -93      | 29    |
| H5   | 754      | 591      | 352      | 33    |
| H7   | -1797    | 887      | 2906     | 28    |
| H8   | -814     | 2705     | 2501     | 24    |
| H9A  | 975      | 5428     | 2949     | 41    |
| H9B  | 1336     | 6779     | 2350     | 41    |
| H9C  | 2383     | 5913     | 2234     | 41    |
| H10A | -626     | 5976     | 1125     | 46    |
| H10B | -396     | 6933     | 1549     | 46    |
| H10C | -827     | 5626     | 2280     | 46    |
| H11  | 4815     | 2380     | 1610     | 23    |
| H14  | 4845     | 2736     | -1377    | 33    |
| H15  | 3909     | 1174     | -1500    | 36    |
| H17  | 2981     | -516     | 1471     | 36    |
| H18  | 3892     | 1062     | 1585     | 34    |
| H19A | 6629     | 2497     | 2053     | 40    |
| H19B | 7746     | 3503     | 1461     | 40    |
| H19C | 7474     | 2717     | 901      | 40    |
| H20A | 4774     | 4968     | 2068     | 46    |
| H20B | 6062     | 4844     | 2211     | 46    |
| H20C | 5046     | 3756     | 2717     | 46    |
| H21  | 2309     | 1915     | 5557     | 27    |
| H24  | 2486     | 217      | 5246     | 33    |
| H25  | 1700     | -1476    | 5216     | 34    |
| H27  | 852      | 398      | 2855     | 34    |
| H28  | 1554     | 2087     | 2938     | 32    |
| H29A | 1222     | 4357     | 4903     | 51    |
| H29B | 1639     | 4940     | 5540     | 51    |
| H29C | 1090     | 3616     | 6019     | 51    |
| H30A | 2901     | 2954     | 6565     | 52    |
| H30B | 3584     | 4228     | 6119     | 52    |
| H30C | 4335     | 3204     | 5845     | 52    |
| H16  | 6130(40) | 1560(40) | 6970(30) | 62    |
| H31A | 6745     | 3159     | 5820     | 64    |
| H31B | 7207     | 3607     | 6512     | 64    |
| H31C | 5761     | 3315     | 6817     | 64    |
